# Supplementary material for: Understanding of facial features in face perception: insights from deep convolutional neural networks
Source: Frontiers journal article supplement (doi:10.3389/fncom.2024.1209082), 2024-04-09
Supplement: Data_Sheet_1.PDF [file Data_Sheet_1.PDF]

# Supplementary Material

## 1 SUPPLEMENTARY TABLES

### 1.1 Tables

**Table S1.** Validation performance of ResNet-100 on Masking Data Augmentation. "Val" represents the validation set, "Eyebrows" denotes the validation set after masking eyebrows, "Eyes" after masking eyes, "Mouth" after masking mouth, and "Nose" after masking nose. The values in parentheses denote the recognition accuracy without data augmentation.

|            | Val           | Eyebrows      | Eyes          | Mouth         | Nose          |
|------------|---------------|---------------|---------------|---------------|---------------|
| Face_data1 | 86.6% (86.2%) | 66.3% (38.0%) | 67.3% (53.1%) | 76.2% (64.8%) | 76.5% (72.5%) |
| Face_data2 | 86.4% (87.1%) | 63.1% (43.4%) | 70.4% (60.3%) | 74.5% (69.2%) | 75.0% (71.1%) |
| Face_data3 | 85.7% (86.3%) | 65.3% (49.3%) | 68.5% (55.9%) | 72.8% (64.8%) | 74.1% (66.5%) |

**Table S2.** Performance comparison of three models on different datasets. "Val" represents the validation set, "Eyebrows" denotes the validation set after masking eyebrows, "Eyes" after masking eyes, "Mouth" after masking mouth, and "Nose" after masking nose.

#### (a) Validation performance of VGG-16

|            | Val   | Eyebrows | Eyes  | Mouth | Nose  |
|------------|-------|----------|-------|-------|-------|
| Face_data1 | 82.3% | 23.1%    | 31.0% | 51.6% | 39.0% |
| Face_data2 | 81.6% | 9.9%     | 16.7% | 43.3% | 27.2% |
| Face_data3 | 86.9% | 27.3%    | 33.4% | 55.6% | 44.6% |

#### (b) Validation performance of VGG-19

|            | Val   | Eyebrows | Eyes  | Mouth | Nose  |
|------------|-------|----------|-------|-------|-------|
| Face_data1 | 85.0% | 24.9%    | 25.2% | 46.2% | 31.7% |
| Face_data2 | 83.9% | 17.3%    | 19.9% | 42.0% | 28.2% |
| Face_data3 | 84.0% | 24.6%    | 24.6% | 38.1% | 29.1% |

#### (c) Validation performance of Resnet-50

|            | Val   | Eyebrows | Eyes  | Mouth | Nose  |
|------------|-------|----------|-------|-------|-------|
| Face_data1 | 87.4% | 31.8%    | 49.3% | 60.6% | 68.2% |
| Face_data2 | 85.0% | 42.1%    | 54.7% | 60.1% | 67.2% |
| Face_data3 | 88.0% | 45.7%    | 54.7% | 67.3% | 70.1% |

**Table S3.** Validation performance of ResNet-100 on different Loss Functions. "Val" represents the validation set, "Eyebrows" denotes the validation set after masking eyebrows, "Eyes" after masking eyes, "Mouth" after masking mouth, and "Nose" after masking nose. The results represent recognition accuracy, with values in parentheses indicating recognition accuracy using Cross Entropy as the Loss Function.

(a) Validation performance on arcface Loss.

|            | <b>Val</b>       | <b>Eyebrows</b>  | <b>Eyes</b>      | <b>Mouth</b>     | <b>Nose</b>      |
|------------|------------------|------------------|------------------|------------------|------------------|
| Face_data1 | 90.4%<br>(86.2%) | 33.8%<br>(38.0%) | 49.9%<br>(53.1%) | 70.5%<br>(64.8%) | 66.4%<br>(72.5%) |
| Face_data2 | 89.7%<br>(87.1%) | 39.0%<br>(43.4%) | 52.7%<br>(60.3%) | 73.3%<br>(69.2%) | 68.1%<br>(71.1%) |
| Face_data3 | 90.9%<br>(86.3%) | 38.1%<br>(49.3%) | 55.3%<br>(55.9%) | 70.9%<br>(64.8%) | 71.3%<br>(66.5%) |

(b) Validation performance on cosface Loss.

|            | <b>Val</b>       | <b>Eyebrows</b>  | <b>Eyes</b>      | <b>Mouth</b>     | <b>Nose</b>      |
|------------|------------------|------------------|------------------|------------------|------------------|
| Face_data1 | 91.5%<br>(86.2%) | 39.3%<br>(38.0%) | 57.3%<br>(53.1%) | 71.9%<br>(64.8%) | 74.0%<br>(72.5%) |
| Face_data2 | 89.2%<br>(87.1%) | 35.1%<br>(43.4%) | 46.4%<br>(60.3%) | 70.7%<br>(69.2%) | 71.1%<br>(71.1%) |
| Face_data3 | 90.8%<br>(86.3%) | 31.3%<br>(49.3%) | 44.4%<br>(55.9%) | 66.6%<br>(64.8%) | 69.6%<br>(66.5%) |

**Table S4.** Validation performance of ResNet-100 on Various Expressions and Overall Val.

|            | <b>Happiness</b> | <b>Disgust</b> | <b>Surprise</b> | <b>Repression</b> | <b>Other</b> | <b>Val</b> |
|------------|------------------|----------------|-----------------|-------------------|--------------|------------|
| Face_data1 | 86.3%            | 85.8%          | 86.1%           | 85.8%             | 86.1%        | 86.2%      |
| Face_data2 | 87.0%            | 87.5%          | 86.6%           | 86.7%             | 87.2%        | 87.1%      |
| Face_data3 | 86.6%            | 86.4%          | 86.7%           | 86.1%             | 85.9%        | 86.3%      |

**Table S5.** Validation performance of ResNet-100 with facial features masking on various expressions and overall validation set. "Val" and expressions such as "Happiness" represent the recognition accuracy after masking specific facial features.

(a) Recognition accuracy on masking eyebrows across various expressions.

|            | <b>Happiness</b> | <b>Disgust</b> | <b>Surprise</b> | <b>Repression</b> | <b>Other</b> | <b>Val</b> |
|------------|------------------|----------------|-----------------|-------------------|--------------|------------|
| Face_data1 | 38.3%            | 38.2%          | 38.0%           | 38.0%             | 37.7%        | 38.0%      |
| Face_data2 | 42.5%            | 43.1%          | 43.6%           | 42.9%             | 43.0%        | 43.4%      |
| Face_data3 | 48.9%            | 50.6%          | 49.2%           | 49.3%             | 49.4%        | 49.3%      |

(b) Recognition accuracy on masking eyes across various expressions.

|            | <b>Happiness</b> | <b>Disgust</b> | <b>Surprise</b> | <b>Repression</b> | <b>Other</b> | <b>Val</b> |
|------------|------------------|----------------|-----------------|-------------------|--------------|------------|
| Face_data1 | 53.3%            | 53.0%          | 52.8%           | 53.2%             | 52.6%        | 53.1%      |
| Face_data2 | 58.9%            | 60.9%          | 58.8%           | 61.5%             | 60.6%        | 60.3%      |
| Face_data3 | 56.9%            | 56.5%          | 55.3%           | 55.5%             | 55.6%        | 55.9%      |

(c) Recognition accuracy on masking mouth across various expressions.

|            | <b>Happiness</b> | <b>Disgust</b> | <b>Surprise</b> | <b>Repression</b> | <b>Other</b> | <b>Val</b> |
|------------|------------------|----------------|-----------------|-------------------|--------------|------------|
| Face_data1 | 65.7%            | 64.3%          | 64.5%           | 65.3%             | 64.4%        | 64.8%      |
| Face_data2 | 69.9%            | 70.0%          | 68.6%           | 68.8%             | 69.1%        | 69.2%      |
| Face_data3 | 64.5%            | 66.1%          | 64.1%           | 63.8%             | 64.4%        | 64.8%      |

(d) Recognition accuracy on masking nose across various expressions.

|            | <b>Happiness</b> | <b>Disgust</b> | <b>Surprise</b> | <b>Repression</b> | <b>Other</b> | <b>Val</b> |
|------------|------------------|----------------|-----------------|-------------------|--------------|------------|
| Face_data1 | 73.6%            | 72.8%          | 72.0%           | 71.8%             | 72.2%        | 72.5%      |
| Face_data2 | 71.5%            | 72.2%          | 70.7%           | 71.1%             | 70.9%        | 71.1%      |
| Face_data3 | 66.4%            | 66.6%          | 67.2%           | 65.9%             | 65.7%        | 66.5%      |
